# Supplementary material for: Low Molecular Weight Heparin Treatment Patterns and Outcomes in Cancer Patients with Acute Venous Thromboembolism: A Nationwide Cohort Study in France
Source: MDPI journal article supplement (doi:10.3390/cancers15113011), 2023-05-31
Supplement: s1 [file s1]

# Supplementary Materials: Low Molecular Weight Heparin Treatment Patterns and Outcomes in Cancer Patients with Acute Venous Thromboembolism: A Nationwide Cohort Study in France

Laurent Bertoletti, Gaelle Gusto, Nadia Quignot, Artak Khachatryan, Jose Chaves, Audrey Moniot, Ruth Mokgong and Isabelle Mahé

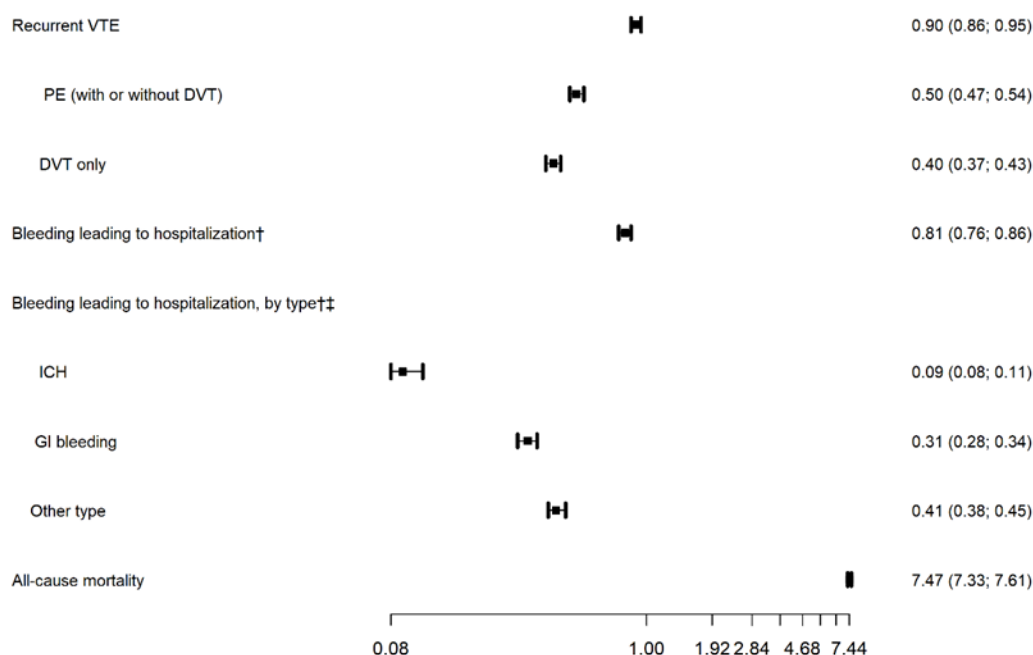

**Figure S1. Clinical outcomes in patients treated with LMWH at 6 months follow-up.** Data are event rates (95% CI) per 100 person-months. Abbreviations: CI, confidence interval; DVT, deep vein thrombosis; GI, gastrointestinal; ICH, intracerebral hemorrhage; LMWH, low molecular weight heparin; PE, pulmonary embolism; VTE, venous thromboembolism.

**Table S1. Cancer-related treatments and procedures in LMWH-treated patients with VTE.**

| Criteria                                   | n (%)         |
|--------------------------------------------|---------------|
| Any criteria                               | 31,771 (100)  |
| Criterion 1 only                           | 7,535 (23.7)  |
| Criterion 2 only                           | 879 (2.8)     |
| Criterion 3 only                           | 754 (2.4)     |
| Criteria 1 and 2                           | 638 (2.0)     |
| Criteria 1 and 3                           | 955 (3.0)     |
| Criteria 2 and 3                           | 613 (1.9)     |
| Criteria 1, 2, and 3                       | 20,397 (64.2) |
| Cancer-related ICD-10 code (active cancer) | 30,892 (97.2) |

Criterion 1: ICD-10 discharge diagnosis for cancer in the hospital database as the principal diagnosis or  $\geq 2$  associated diagnoses or ALD registration within 6 months before or 30 days after the index VTE event. Criterion 2: Record of  $\geq 1$  of the following cancer-related treatments and procedures within 6 months before or 30 days after the index VTE event: chemotherapy treatment for cancer, follow-up exam or convalescence for chemotherapy, radiotherapy for cancer. Criterion 3: Record of immunotherapy or hormone therapy or any chemotherapy within 6 months before or 30 days after the index VTE event AND record of an ICD-10 code for cancer (any diagnosis for a hospital stay within 6 months before or 30 days after the index VTE event or ALD registration within 12 months

before or 30 days after the index VTE event). Abbreviations: ALD, *affections de longue durée* (long-term illness/disease); ICD, International Classification of Diseases; LMWH, low molecular weight heparin; VTE, venous thromboembolism.

**Table S2.** Patient disposition according to follow-up time.

|                                                  | Follow-up period |               |               |               |
|--------------------------------------------------|------------------|---------------|---------------|---------------|
|                                                  | 0–3 months       | >3–6 months   | >6–12 months  | >12 months    |
| All patients (N=31,771), n (%)                   |                  |               |               |               |
| Included at start of follow-up period            | 31,771 (100.0)   | 24,869 (78.3) | 20,882 (65.7) | 14,751 (46.4) |
| Died during follow-up                            | 6,827 (21.5)     | 3,909 (12.3)  | 4,270 (13.4)  | 5,544 (17.4)  |
| Alive at end of follow-up                        | 24,944 (78.5)    | 20,960 (66.0) | 16,612 (52.3) | 9,207 (29.0)  |
| Lost to follow-up                                | 75 (0.2)         | 78 (0.2)      | 1861 (5.9)    |               |
| Stopped or switched index treatment <sup>a</sup> | 6,758 (27.1)     | 3,776 (18.0)  | 3,959 (23.8)  | 2,439 (16.5)  |
| AC-naïve (N=14,107), n (%)                       |                  |               |               |               |
| Included at start of follow-up period            | 14,107 (100.0)   | 11,128 (78.9) | 9,442 (66.9)  | 6,723 (47.7)  |
| Died during follow-up                            | 2,954 (20.9)     | 1,653 (11.7)  | 1,809 (12.8)  | 2,265 (16.1)  |
| Alive at end of follow-up                        | 11,153 (79.1)    | 9,475 (67.2)  | 7,633 (54.1)  | 4,458 (31.6)  |
| Lost to follow-up                                | 25 (0.2)         | 33 (0.2)      | 910 (6.5)     |               |
| Stopped or switched index treatment <sup>a</sup> | 2,982 (26.7)     | 1,792 (18.9)  | 1,893 (24.8)  | 1,114 (16.6)  |
| AC-experienced (N=17,664), n (%)                 |                  |               |               |               |
| Included at start of follow-up period            | 17,664 (100.0)   | 13,741 (77.8) | 11,440 (64.8) | 8,028 (45.4)  |
| Died during follow-up                            | 3,873 (21.9)     | 2,256 (12.8)  | 2,461 (13.9)  | 3,279 (18.6)  |
| Alive at end of follow-up                        | 13,791 (78.1)    | 11,485 (65.0) | 8,979 (50.8)  |               |
| Lost to follow-up                                | 50 (0.3)         | 45 (0.3)      | 951 (5.4)     |               |
| Stopped or switched index treatment <sup>a</sup> | 3,776 (27.4)     | 1,984 (17.3)  | 2,066 (23.0)  | 1,325 (16.5)  |

<sup>a</sup>Among patients who were still alive at the end of the follow-up period. Abbreviations: AC, anticoagulant.

**Table S3.** Clinical characteristics of patients in subgroups 1 and 2.

|                                                                                                                    | Subgroup 1<br>(N=25,256) | Subgroup 2<br>(N=3,805) | P-value (subgroup<br>2 vs. subgroup 1) <sup>a</sup> |
|--------------------------------------------------------------------------------------------------------------------|--------------------------|-------------------------|-----------------------------------------------------|
| Age at index date (years), mean (SD)                                                                               | 66.1 (13.2)              | 67.2 (12.9)             | <0.0001                                             |
| Male, n (%)                                                                                                        | 12,996 (51.5)            | 1,850 (48.6)            | 0.004                                               |
| Deprivation index Q4, n (%)                                                                                        | 9,102 (36.0)             | 1,304 (34.3)            | 0.056                                               |
| Deprivation index Q5, n (%)                                                                                        | 1,301 (5.2)              | 163 (4.3)               | 0.016                                               |
| Type of VTE, n (%)                                                                                                 |                          |                         |                                                     |
| DVT                                                                                                                | 10,740 (42.5)            | 1,217 (32.0)            | <0.0001                                             |
| PE (with or without DVT)                                                                                           | 14,516 (57.5)            | 2,588 (68.0)            |                                                     |
| Risk of incident VTE based on cancer<br>type, n (%) <sup>b</sup>                                                   |                          |                         |                                                     |
| Very high-risk cancer types: brain,<br>pancreatic, stomach                                                         | 4,347 (17.2)             | 317 (8.3)               | <0.0001                                             |
| High-risk cancer types: lung,<br>lymphoma, gynecologic <sup>c</sup> , bladder,<br>testicular, renal cell carcinoma | 11,638 (46.1)            | 1,568 (41.2)            |                                                     |
| Other cancer types                                                                                                 | 8,966 (35.5)             | 1,786 (46.9)            |                                                     |
| Unknown cancer (ICD-10<br>information missing)                                                                     | 305 (1.2)                | 134 (3.5)               |                                                     |
| Metastatic vs non metastatic disease, n<br>(%)                                                                     |                          |                         |                                                     |
| Metastatic disease (C77*-C80*)                                                                                     | 18,488 (74.9)            | 1,958 (52.8)            | <0.0001                                             |
| Non-metastatic disease                                                                                             | 5,901 (23.9)             | 1,615 (43.6)            |                                                     |
| Unknown (ICD-10 information<br>missing)                                                                            | 305 (1.2)                | 134 (3.6)               |                                                     |
| Baseline comorbidities (assessed 24<br>months prior)                                                               |                          |                         |                                                     |

|                                                 |               |              |         |
|-------------------------------------------------|---------------|--------------|---------|
| CCI, mean (SD)                                  | 6.7 (3.2)     | 5.3 (3.2)    | <0.0001 |
| CCI 2, n (%)                                    | 4,713 (18.7)  | 1,186 (31.2) | <0.0001 |
| CCI 3, n (%)                                    | 2,266 (9.0)   | 502 (13.2)   |         |
| CCI 4 or more, n (%)                            | 18,277 (72.4) | 2,117 (55.6) |         |
| Baseline bleed, all diagnoses, n (%)            | 3,252 (12.9)  | 429 (11.3)   | 0.006   |
| Baseline bleed, principal diagnosis only, n (%) | 1,070 (4.2)   | 135 (3.5)    | 0.06    |
| Comorbidities, n (%)                            |               |              |         |
| Hypertension                                    | 8,761 (34.7)  | 1,478 (38.8) | <0.0001 |
| Anemia                                          | 7,955 (31.5)  | 947 (24.9)   | <0.0001 |
| Diabetes                                        | 4,205 (16.6)  | 578 (15.2)   | 0.066   |
| Pulmonary disease                               | 2,977 (11.8)  | 411 (10.8)   | 0.043   |
| Obesity                                         | 2,709 (10.7)  | 623 (16.4)   | <0.0001 |
| Cerebrovascular disease                         | 1,155 (4.6)   | 184 (4.8)    | 0.71    |
| Moderate to severe renal disease                | 1,075 (4.3)   | 167 (4.4)    | 0.75    |
| History of falls                                | 525 (2.1)     | 78 (2.0)     | 0.72    |
| LMWH treatment duration (months), mean (SD)     | 7.04 (9.1)    | 7.78 (9.9)   | <0.0001 |

<sup>a</sup> Chi-square test for categorical variables and ANOVA for continuous variables. <sup>b</sup> Based on the Khorana score. <sup>c</sup> Gynecologic cancers included malignant neoplasms of the vulva, vagina, cervix uteri, corpus uteri, uterus part unspecified, ovary, placenta, and other and unspecified female genital organs. Abbreviations: CCI, Charlson Comorbidity Index; DVT, deep vein thrombosis; ICD, International Classification of Diseases; LMWH, low molecular weight heparin; PE, pulmonary embolism; Q, quintile; SD, standard deviation; VTE, venous thromboembolism.

**Table S4.** Clinical outcomes at 6 months for patients in subgroups 1 and 2.

| Clinical outcomes, 6 months                                                    | Subgroup 1 (N=25,256) | Subgroup 2 (N=3,805) |
|--------------------------------------------------------------------------------|-----------------------|----------------------|
| VTE recurrence, n (%)                                                          | 1,038 (4.1)           | 131 (3.4)            |
| VTE recurrence, crude rate per 100 PM (95% CI)                                 | 0.90 (0.85; 0.96)     | 0.85 (0.72; 1.01)    |
| VTE recurrence: PE (with or without DVT), n (%)                                | 589 (2.3)             | 62 (1.6)             |
| VTE recurrence: PE (with or without DVT), crude rate per 100 PM (95% CI)       | 0.51 (0.47; 0.55)     | 0.4 (0.31; 0.52)     |
| VTE recurrence: DVT only, n (%)                                                | 449 (1.8)             | 69 (1.8)             |
| VTE recurrence: DVT only, crude rate per 100 PM (95% CI)                       | 0.39 (0.36; 0.43)     | 0.45 (0.35; 0.57)    |
| Overall bleeding, principal diagnosis, n (%)                                   | 1,008 (4.0)           | 66 (1.7)             |
| Overall bleeding, principal diagnosis, crude rate per 100 PM (95% CI)          | 0.87 (0.82; 0.93)     | 0.43 (0.34; 0.55)    |
| Intracranial bleeding, principal diagnosis, n (%)                              | 123 (0.5)             | <10                  |
| Intracranial bleeding, principal diagnosis, crude rate per 100 PM (95% CI)     | 0.11 (0.09; 0.13)     | 0.03 (0.01; 0.08)    |
| Gastrointestinal bleeding, principal diagnosis, n (%)                          | 395 (1.6)             | 19 (0.5)             |
| Gastrointestinal bleeding, principal diagnosis, crude rate per 100 PM (95% CI) | 0.34 (0.31; 0.38)     | 0.12 (0.08; 0.19)    |
| Bleeding from other sites, principal diagnosis, n (%) <sup>a</sup>             | 498 (2.0)             | 42 (1.1)             |
| Bleeding from other sites, principal diagnosis, crude rate per 100 PM (95% CI) | 0.43 (0.40; 0.47)     | 0.27 (0.20; 0.37)    |
| CTEPH, n (%)                                                                   | 48 (0.2)              | <10                  |
| CTEPH, crude rate per 100 PM (95% CI)                                          | 0.04 (0.03; 0.06)     | 0.05 (0.02; 0.10)    |
| All-cause death, n (%) <sup>b</sup>                                            | 10,383 (41.1)         | -                    |
| All-cause death, crude rate per 100 PM (95% CI)                                | 9.01 (8.84; 9.17)     | -                    |

<sup>a</sup> Other bleeding sites include: uterine and vaginal, intraocular, otorrhagia, pericardial, respiratory, and intra-articular. <sup>b</sup> Data were censored at treatment switching, so data on death was not collected for subgroup 2. Abbreviations: AC, anticoagulant; CI, confidence interval; CTEPH, chronic thromboembolic pulmonary hypertension; DVT, deep vein thrombosis; PE, pulmonary embolism; PM, person-months; VTE, venous thromboembolism.

**Table S5.** Clinical outcomes at 12 months for patients in subgroups 1 and 2.

| Clinical outcomes, 12 months                                                   | Subgroup 1 (N=25,256) | Subgroup 2 (N=3,805) |
|--------------------------------------------------------------------------------|-----------------------|----------------------|
| VTE recurrence, n (%)                                                          | 1,264 (5.0)           | 178 (4.7)            |
| VTE recurrence, crude rate per 100 PM (95% CI)                                 | 0.68 (0.64; 0.71)     | 0.84 (0.73; 0.98)    |
| VTE recurrence: PE (with or without DVT), n (%)                                | 740 (2.9)             | 89 (2.3)             |
| VTE recurrence: PE (with or without DVT), crude rate per 100 PM (95% CI)       | 0.40 (0.37; 0.43)     | 0.42 (0.34; 0.52)    |
| VTE recurrence: DVT only, n (%)                                                | 524 (2.1)             | 89 (2.3)             |
| VTE recurrence: DVT only, crude rate per 100 PM (95% CI)                       | 0.28 (0.26; 0.31)     | 0.42 (0.34; 0.52)    |
| Overall bleeding, principal diagnosis, n (%)                                   | 1,301 (5.2)           | 81 (2.1)             |
| Overall bleeding, principal diagnosis, crude rate per 100 PM (95% CI)          | 0.70 (0.66; 0.74)     | 0.38 (0.31; 0.48)    |
| Intracranial bleeding, principal diagnosis, n (%)                              | 167 (0.7)             | <10                  |
| Intracranial bleeding, principal diagnosis, crude rate per 100 PM (95% CI)     | 0.09 (0.08; 0.10)     | 0.03 (0.01; 0.06)    |
| Gastrointestinal bleeding, principal diagnosis, n (%)                          | 506 (2.0)             | 24 (0.6)             |
| Gastrointestinal bleeding, principal diagnosis, crude rate per 100 PM (95% CI) | 0.27 (0.25; 0.30)     | 0.11 (0.08; 0.17)    |
| Bleeding from other sites, principal diagnosis, n (%) <sup>a</sup>             | 638 (2.5)             | 51 (1.3)             |
| Bleeding from other sites, principal diagnosis, crude rate per 100 PM (95% CI) | 0.34 (0.32; 0.37)     | 0.24 (0.18; 0.32)    |
| CTEPH, n (%)                                                                   | 60 (0.2)              | <10                  |
| CTEPH, crude rate per 100 PM (95% CI)                                          | 0.03 (0.02; 0.04)     | 0.04 (0.02; 0.08)    |
| All-cause death, n (%) <sup>b</sup>                                            | 14,124 (55.9)         | -                    |
| All-cause death, crude rate per 100 PM (95% CI)                                | 7.56 (7.44; 7.68)     | -                    |

<sup>a</sup> Other bleeding sites include: uterine and vaginal, intraocular, otorrhagia, pericardial, respiratory, and intra-articular. <sup>b</sup> Data was censored at treatment switching, so data on death was not collected for subgroup 2. Abbreviations: AC, anticoagulant; CI, confidence interval; CTEPH, chronic thromboembolic pulmonary hypertension; DVT, deep vein thrombosis; PE, pulmonary embolism; PM, person-months; VTE, venous thromboembolism.
